# Supplementary material
Source: MDPI journal article supplement (https://www.mdpi.com/1424-2818/14/8/598)
Supplement: s1 [file s1]

# Supplementary Materials

**Table S1.** Characteristics of the sources used to determine flora accompanying *Bidens frondosa* in the study area. Regions are numbered according to the state system of region numeration.

| Administrative Region   | Number of the region | Sources                                                                                    | Year(s) of the <i>B. frondosa</i> studies | Number of floristic lists used per region |
|-------------------------|----------------------|--------------------------------------------------------------------------------------------|-------------------------------------------|-------------------------------------------|
| Belgorod Region         | 31                   | No data                                                                                    | –                                         | –                                         |
| Bryansk Region          | 32                   | Panasenko et al. (2015), Arepieva & Panasenکو (2020), Bulokhov et al. (2021)               | 1984, 1985, 1990, 2013–2019               | 82                                        |
| Chelyabinsk Region      | 74                   | No data                                                                                    | –                                         | –                                         |
| Chuvash Republic        | 21                   | Gafurova (2017)                                                                            | 2001                                      | 1                                         |
| Ivanovo Region          | 37                   | Borisova et al. (2013), Borisova & Shilov (2016), Borisova et al. (2019), Dmitrieva (2021) | 2013, 2016, 2019, 2021                    | 3                                         |
| Kaluga Region           | 40                   | Semenishchenkov (2014)                                                                     | 2013                                      | 2                                         |
| Kirov Region            | 43                   | No data                                                                                    | –                                         | –                                         |
| Kurgan Region           | 45                   | Data of the authors                                                                        | 2021                                      | 6                                         |
| Kursk Region            | 46                   | Poluyanov (2008)                                                                           | 2005, 2007, 2008, 2013                    | 9                                         |
| Leningrad Region        | 47                   | Glazkova (2005)                                                                            | 2004                                      | 1                                         |
| Lipetsk Region          | 48                   | Oral communication of Elena A. Starodubtseva                                               | 2011, 2016, 2018                          | 5                                         |
| Moscow Region           | 50                   | No data                                                                                    | –                                         | –                                         |
| Nizhnii Novgorod Region | 52                   | No data                                                                                    | –                                         | –                                         |
| Novgorod Region         | 53                   | No data                                                                                    | –                                         | –                                         |
| Orel Region             | 57                   | No data                                                                                    | –                                         | –                                         |
| Orenburg Region         | 56                   | Lapov (2011)                                                                               | 2009                                      | 1                                         |
| Penza Region            | 58                   | Vasjukov et al. (2014, 2019); oral communication of Vladimir M. Vasjukov                   | 2013, 2017, 2021                          | 6                                         |
| Permsky Krai            | 59                   | No data                                                                                    | –                                         | –                                         |
| Pskov Region            | 60                   | No data                                                                                    | –                                         | –                                         |
| Republic of Bashkiria   | 02                   | Abramova (2011), Golovanov & Abramova (2012)                                               | 2000, 2009                                | 9                                         |
| Republic of Mari El     | 12                   | No data                                                                                    | –                                         | –                                         |
| Republic of Mordovia    | 13                   | Data of the authors                                                                        | 2013, 2014, 2021                          | 16                                        |
| Republic of Tatarstan   | 16                   | Prokhorov et al. (2017)                                                                    | 2011, 2015, 2017                          | 4                                         |
| Republic of Udmurtia    | 18                   | No data                                                                                    | –                                         | –                                         |
| Ryazan Region           | 62                   | No data                                                                                    | –                                         | –                                         |
| Samara Region           | 63                   | Solov'eva & Saksonov (2007), Lapov (2011), Solovyova (2017, 2020)                          | 2005, 2006, 2009                          | 10                                        |
| Saratov Region          | 64                   | No data                                                                                    | –                                         | –                                         |
| Smolensk Region         | 67                   | No data                                                                                    | –                                         | –                                         |
| Sverdlovsk Region       | 66                   | Data of the authors                                                                        | 2015                                      | 6                                         |
| Tambov Region           | 68                   | Oral communication of Elena V. Ershkova                                                    | 2014                                      | 1                                         |
| Tula Region             | 71                   | No data                                                                                    | –                                         | –                                         |
| Tver Region             | 69                   | No data                                                                                    | –                                         | –                                         |
| Tyumen Region           | 72                   | Data of the authors                                                                        | 2018–2021                                 | 9                                         |
| Ulyanovsk Region        | 73                   | Vargot (2009), Vargot et al. (2015), Ruchin et al. (2016)                                  | 2007, 2014                                | 5                                         |
| Vladimir Region         | 33                   | Seregin (2008), Borisova (2015)                                                            | 2007, 2014                                | 2                                         |
| Voronezh Region         | 36                   | Oral communication of Elena A. Starodubtseva                                               | 2007, 2009, 2010, 2012, 2013, 2016        | 8                                         |
| Yaroslavl Region        | 76                   | Belyakov (2020), Krylova et al. (2021)                                                     | 2018, 2019                                | 5                                         |

**Table S2.** Designations of environmental factor scores based on Tsyganov (1983).

| Score                         | Designation of scores in each environmental factor                                    | Ecological group name |
|-------------------------------|---------------------------------------------------------------------------------------|-----------------------|
| TM – thermoclimatic scale     |                                                                                       |                       |
| 1                             | arctic (0-10 kcal/cm×cm×year)                                                         | polar                 |
| 2                             | arctic / sub-arctic                                                                   | mesoarctic            |
| 3                             | sub-arctic (10-20 kcal/cm×cm×year)                                                    | sub-arctic            |
| 4                             | sub-arctic / boreal                                                                   | arctoboreal           |
| 5                             | boreal (20-30 kcal/cm×cm×year)                                                        | euboreal              |
| 6                             | boreal / sub-boreal                                                                   | mesoboreal            |
| 7                             | sub-boreal (30-40 kcal/cm×cm×year)                                                    | sub-boreal            |
| 8                             | sub-boreal / nemoral                                                                  | boreal-nemoral        |
| 9                             | nemoral (40-50 kcal/cm×cm×year)                                                       | eunemoral             |
| 10                            | nemoral / sub-Mediterranean                                                           | thermonemoral         |
| 11                            | sub-Mediterranean (50-60 kcal/cm×cm×year)                                             | sub-mediterranean     |
| 12                            | sub-Mediterranean / Mediterranean                                                     | mesomediterranean     |
| 13                            | Mediterranean (60-70 kcal/cm×cm×year)                                                 | eumediterranean       |
| 14                            | Mediterranean / tropical                                                              | subtropical           |
| 15                            | tropical (70-80 kcal/cm×cm×year)                                                      | tropical              |
| 16                            | tropical / equatorial                                                                 | subequatorial         |
| 17                            | equatorial (80 kcal/cm×cm×year)                                                       | equatorial            |
| KN – climate continentality   |                                                                                       |                       |
| 1                             | extraoceanic                                                                          | extraoceanic          |
| 2                             | extraoceanic / oceanic                                                                | oceanic 1st           |
| 3                             | oceanic                                                                               | oceanic 2nd           |
| 4                             | oceanic / marine                                                                      | sub-oceanic           |
| 5                             | marine                                                                                | marine                |
| 6                             | marine / sub-mainland                                                                 | seaboard              |
| 7                             | sub-mainland                                                                          | sub-mainland          |
| 8                             | sub-mainland / mainland                                                               | mainland 1st          |
| 9                             | mainland                                                                              | mainland 2nd          |
| 10                            | mainland / sub-continental                                                            | semi-continental      |
| 11                            | sub-continental                                                                       | sub-continental       |
| 12                            | sub-continental / continental                                                         | mesocontinental       |
| 13                            | continental                                                                           | continental 1st       |
| 14                            | continental / ultra-continental                                                       | continental 2nd       |
| 15                            | ultra-continental                                                                     | ultra-continental     |
| OM – climate aridity/humidity |                                                                                       |                       |
| 1                             | extra-arid (P-E = -1600 mm/year and lower): P-precipitation/year, E-evaporation/year  | extra-arid            |
| 2                             | extraarid / arid                                                                      | perarid               |
| 3                             | arid (P-E = -800 - 1600 mm/year): P-precipitation/year, E-evaporation/year            | arid                  |
| 4                             | arid / mesoarid                                                                       | mesoarid 1st          |
| 5                             | mesoarid (P-E = -400 - 800 mm/year): P-precipitation/year, E-evaporation/year         | mesoarid 2nd          |
| 6                             | mesoarid / sub-arid                                                                   | sub-arid 1st          |
| 7                             | sub-arid (P-E = 0-400 mm/year): P-precipitation/year, E-evaporation/year              | sub-arid 2nd          |
| 8                             | sub-arid / sub-humid                                                                  | semi-arid             |
| 9                             | sub-humid (P-E = 0-400 mm/year): P-precipitation/year, E-evaporation/year             | sub-humid 1st         |
| 10                            | sub-humid / humid                                                                     | sub-humid 2nd         |
| 11                            | humid (P-E = 400-800 mm/year): P-precipitation/year, E-evaporation/year               | meso-humid            |
| 12                            | humid / perhumid                                                                      | euhumid               |
| 13                            | perhumid (P-E = 800-1600 mm/year): P-precipitation/year, E-evaporation/year           | perhumid 1st          |
| 14                            | perhumid / hyper-humid                                                                | perhumid 2nd          |
| 15                            | hyper-humid (P-E = 1600 mm/year and higher): P-precipitation/year, E-evaporation/year | hyper-humid           |
| CR – cryoclimatic scale       |                                                                                       |                       |
| 1                             | very severe winters (mean temperature of the coldest month: < -32°C)                  | hypercryothermic 1st  |
| 2                             | very severe winters / severe winters                                                  | hypercryothermic 2nd  |
| 3                             | severe winters (mean temperature of the coldest month: between -24°C and -32°C)       | percryothermic 1st    |
| 4                             | severe winters / quite severe winters                                                 | percryothermic 2nd    |
| 5                             | quite severe winters (mean temperature of the coldest month: between -16°C and -24°C) | cryothermic 1st       |
| 6                             | quite severe winters / moderate winters                                               | cryothermic 2nd       |
| 7                             | moderate winters (mean temperature of the coldest month: between -8°C and -16°C)      | sub-cryothermic 1st   |
| 8                             | moderate winters / mild winters                                                       | sub-cryothermic 2nd   |

|                                    |                                                                                   |                       |
|------------------------------------|-----------------------------------------------------------------------------------|-----------------------|
| 9                                  | mild winters (mean temperature of the coldest month: between 0°C and -8°C)        | hemi-cryothermic 1st  |
| 10                                 | mild winters / warm winters                                                       | hemi-cryothermic 2nd  |
| 11                                 | warm winters (mean temperature of the coldest month: between 0°C and +8°C)        | acryothermic          |
| 12                                 | warm winters / very warm winters                                                  | sub-thermophilic 1st  |
| 13                                 | very warm winters (mean temperature of the coldest month: between +8°C and +16°C) | sub-thermophilic 2nd  |
| 14                                 | very warm winters / unexpressed winters                                           | thermophilic 1st      |
| 15                                 | unexpressed winters (mean temperature of the coldest month: > +16°C)              | thermophilic 2nd      |
| HD – soil moisture                 |                                                                                   |                       |
| 1                                  | desert                                                                            | dry desert            |
| 2                                  | desert / semi-desert                                                              | mid-desert            |
| 3                                  | semi-desert                                                                       | semi-desert           |
| 4                                  | semi-desert / dry-steppe                                                          | desert-steppe         |
| 5                                  | dry-steppe                                                                        | sub-steppe            |
| 6                                  | dry-steppe / middle-steppe                                                        | dry steppe            |
| 7                                  | middle-steppe                                                                     | mid-steppe            |
| 8                                  | middle-steppe / meadow-steppe                                                     | fresh-steppe          |
| 9                                  | meadow-steppe                                                                     | humid-steppe          |
| 10                                 | meadow-steppe / dry forest-meadow                                                 | sub-forest-meadow     |
| 11                                 | dry forest-meadow                                                                 | dry forest-meadow     |
| 12                                 | dry forest-meadow / moist forest-meadow                                           | fresh forest-meadow   |
| 13                                 | moist forest-meadow                                                               | humid forest meadow   |
| 14                                 | moist forest-meadow / wet forest-meadow                                           | dampish forest-meadow |
| 15                                 | wet forest-meadow                                                                 | damp forest-meadow    |
| 16                                 | wet forest-meadow / palustrine forest-meadow                                      | wet forest-meadow     |
| 17                                 | palustrine forest-meadow                                                          | swamp forest-meadow   |
| 18                                 | palustrine forest-meadow / palustrine                                             | sub-mire              |
| 19                                 | palustrine                                                                        | mire                  |
| 20                                 | palustrine / semi-aquatic                                                         | aquatic-mire          |
| 21                                 | semi-aquatic                                                                      | semi-aquatic          |
| 22                                 | semi-aquatic / aquatic                                                            | shallow-water         |
| 23                                 | aquatic                                                                           | aquatic               |
| TR – scale of the soil salt regime |                                                                                   |                       |
| 1                                  | especially salt-poor soils                                                        | glycooligotrophic     |
| 2                                  | especially salt-poor soils / salt-poor soils                                      | glycosuboligotrophic  |
| 3                                  | salt-poor soils                                                                   | glycosemioligotrophic |
| 4                                  | salt-poor soils / non-rich in salt soils                                          | glycosubmesotrophic   |
| 5                                  | non-rich in salt soils                                                            | glycomesotrophic      |
| 6                                  | non-rich in salt soils / quite salt-rich soils                                    | glycopermesotrophic   |
| 7                                  | quite salt-rich soils                                                             | glycosemieutrophic    |
| 8                                  | quite salt-rich soils / salt-rich soils                                           | glycosubeutrophic     |
| 9                                  | salt-rich soils                                                                   | glycoeutrophic        |
| 10                                 | salt-rich soils / slightly saline soils                                           | pertrophic            |
| 11                                 | slightly saline soils                                                             | haloeutrophic         |
| 12                                 | slightly saline soils / moderately saline soils                                   | halosubeutrophic      |
| 13                                 | moderately saline soils                                                           | halosemieutrophic     |
| 14                                 | moderately saline soils / highly saline soils                                     | halopermesotrophic    |
| 15                                 | highly saline soils                                                               | halomesotrophic       |
| 16                                 | highly saline soils / extremely saline soils                                      | halosubmesotrophic    |
| 17                                 | extremely saline soils                                                            | halosemioligotrophic  |
| 18                                 | extremely saline soils / extremely salinate fields                                | halosuboligotrophic   |
| 19                                 | extremely salinate fields                                                         | halooligotrophic      |
| NT – soil nitrogen availability    |                                                                                   |                       |
| 1                                  | nitrogen-free soils                                                               | anitrophilic          |
| 2                                  | nitrogen-free soils / very nitrogen-poor soils                                    | sub-anitrophilic 1st  |
| 3                                  | very nitrogen-poor soils                                                          | sub-anitrophilic 2nd  |
| 4                                  | very nitrogen-poor soils / nitrogen-poor soils                                    | hemi-nitrophilic 1st  |
| 5                                  | nitrogen-poor soils                                                               | hemi-nitrophilic 2nd  |
| 6                                  | nitrogen-poor soils / sufficiently nitrogen-rich soils                            | sub-nitrophilic 1st   |
| 7                                  | sufficiently nitrogen-rich soils                                                  | sub-nitrophilic 2nd   |
| 8                                  | sufficiently nitrogen-rich soils / nitrogen-rich soils                            | nitrophilic 1st       |
| 9                                  | nitrogen-rich soils                                                               | nitrophilic 2nd       |
| 10                                 | nitrogen-rich soils / redundantly nitrogen-rich soils                             | nitrophilic 3rd       |
| 11                                 | redundantly nitrogen-rich soils                                                   | nitrophilic 4th       |

| RC – soil pH                   |                                                                     |                          |
|--------------------------------|---------------------------------------------------------------------|--------------------------|
| 1                              | extremely acidic soils (pH < 3.5)                                   | hyperacidophilic 1st     |
| 2                              | extremely acidic soils / very acidic soils                          | hyperacidophilic 2nd     |
| 3                              | highly acidic soils (pH=3.5-4.5)                                    | peracidophilic 1st       |
| 4                              | highly acidic soils / acidic soils                                  | peracidophilic 2nd       |
| 5                              | acidic soils (pH=4.5-5.5)                                           | mesoacidophilic 1st      |
| 6                              | acidic soils / slightly acidic soils                                | mesoacidophilic 2nd      |
| 7                              | slightly acidic soils (pH=5.5-6.5)                                  | subacidophilic 1st       |
| 8                              | slightly acidic soils / neutral soils                               | subacidophilic 2nd       |
| 9                              | neutral soils (pH=6.5-7.2)                                          | neutrophilic             |
| 10                             | neutral soils / slightly alkaline soils                             | sub-alkaliphilic 1st     |
| 11                             | slightly alkaline soils (pH=7.2-8.0)                                | sub-alkaliphilic 2nd     |
| 12                             | slightly alkaline soils / alkaline soils                            | mesoalkaliphilic         |
| 13                             | alkaline soils (pH > 8.0)                                           | alkaliphilic             |
| LC – habitat shading           |                                                                     |                          |
| 1                              | open areas                                                          | out-of-forest (light)    |
| 2                              | open areas / semi-open areas                                        | glade (sub-light)        |
| 3                              | semi-open areas                                                     | shrub                    |
| 4                              | semi-open areas / light forests                                     | sparse forest            |
| 5                              | light forests                                                       | light forest             |
| 6                              | light forests / dark forests                                        | dense light forest       |
| 7                              | dark forests                                                        | dark forests             |
| 8                              | dark forests / especially dark forests                              | thicket-shadow           |
| 9                              | especially dark forests                                             | ultra-shadow             |
| FH – soil-moisture variability |                                                                     |                          |
| 1                              | constant soil moisture                                              | constantophilic 1st      |
| 2                              | constant soil moisture / relatively constant soil moisture          | constantophilic 2nd      |
| 3                              | relatively constant soil moisture                                   | sub-constantophilic 1st  |
| 4                              | relatively constant soil moisture / slightly variable soil moisture | sub-constantophilic 2nd  |
| 5                              | slightly variable soil moisture                                     | hemi-constantophilic 1st |
| 6                              | slightly variable soil moisture / moderately variable soil moisture | sub-constantophilic 2nd  |
| 7                              | moderately variable soil moisture                                   | subcontrastophilic 1st   |
| 8                              | moderately variable soil moisture / highly variable soil moisture   | subcontrastophilic 2nd   |
| 9                              | highly variable soil moisture                                       | contrastophilic 1st      |
| 10                             | highly variable soil moisture / extremely variable soil moisture    | contrastophilic 2nd      |
| 11                             | extremely variable soil moisture                                    | contrastophilic 3rd      |

## References

- Abramova L.M. 2011. Classification of communities with invasive species in the Southern Urals. I. Communities with *Ambrosia* species. *Vegetation of Russia* 19: 3–28. [In Russian]
- Arepieva L.A., Panasenkov N.N. 2020. Communities with *Eragrostis albensis* H. Scholz in the Kursk and Bryansk Regions. *Diversity of plant world* 2(5): 29–36. [In Russian]
- Belyakov E.A., Sakharova E.G., Sokolova A.S. 2020. The current state and dynamics of the flora of several small lakes of the Yaroslavl Region, Russia. *Ecosystem Transformation* 3(4): 95–121. DOI: 10.23859/estr-200519 [In Russian]
- Borisova E.A. 2015. Alien plant species of the Meshchera National Park. *Scientific Proceedings of the State Nature Reserve Prislusky* 30(2): 4–8. [In Russian]
- Borisova E.A., Shilov M.P. 2016. Interesting terates form of *Typha angustifolia* in Ivanovo Region. *Phytodiversity of Eastern Europe* 10(4): 91–93. [In Russian]
- Borisova E.A., Shilov M.P., Shcherbakov A.V., Kurganov A.A. 2013. Lake flora of the Savino district of the Ivanovo region. *Bulletin of the Bryansk Department of the Russian Botanical Society* 2(2): 20–27. [In Russian]
- Borisova E.A., Kurganov A.A., Markov D.S. 2019. Bolshye Rassokhi – lake of Ivanovo Region. *Samarskaya Luka: Problems of Regional and Global Ecology* 28(4): 130–135. DOI: 10.24411/2073-1035-2019-10281 [In Russian]
- Bulokhov A.D., Semishchenkov Yu.A., Panasenkov N.N., Kharin A.V., Akhromeev L.M. 2021. *Diversity and dynamics of grass vegetation of the Desna River floodplain*. Bryansk: RISO BGU. 240 p. [In Russian]
- Dmitrieva Z.M. 2021. Invasive plant species of the Khrushchev park in the city of Ivanovo. In: *Shuya session of students, graduate students, teachers, young scientists: Proceedings of XIV International Scientific Conference*. Moscow; Ivanovo; Shuya: Ivanovo State University. P. 280–282. [In Russian]

- Gafurova M.M. 2017. About a flora of the abolished nature sanctuaries in the buffer zone of the Nature Reserve «Prisursky». *Scientific Proceedings of the State Nature Reserve Prisursky* 32: 35–59. [In Russian]
- Glazkova E.A. 2005. *Bidens frondosa* (Asteraceae), a new adventive species for the flora of North-West Russia and the history of its spreading in East Europe. *Botanicheskii Zhurnal* 90(10): 1525–1540. [In Russian]
- Golovanov Ya.M., Abramova L.M. 2012. Vegetation of Salavat town (Bashkortostan Republic). III. Synantropie vegetation (classes Bidentetea tripartitae, Stellarietea mediae and Artemisietea vulgaris). *Vegetation of Russia* 21: 34–65. [In Russian]
- Krylova E., Garin E., Tihonov A. 2021. Vegetative cover of the mouth of the Chesnava River (Yaroslavl Region). *Transactions of Papanin Institute for Biology of Inland Waters RAS* 93(96): 84–96. DOI: 10.47021/0320-3557-2021-84-96. [In Russian]
- Lapov I.V. 2011. Towards the study of the flora of River Sok. In: *Ecology and geography of plants and communities in Middle Volga Region*. Togliatti: Kassandra. P. 77–83. [In Russian]
- Panasenko N.N., Korosteleva T.P., Romanova J.N. 2015. Distribution of *Xanthium albinum* (Widd.) H. Scholz & Sukopp and its communities in the Bryansk region. *Bulletin of the Bryansk Department of the Russian Botanical Society* 1(5): 48–54. [In Russian]
- Poluyanov A.V. 2008. About some associations of riparian and mire vegetation in the Kursk Region. *Scientific Notes. Electronic Research Journal of the Kursk State University* 4(8): 1–7. [In Russian]
- Prokhorov V., Rogova T., Kozhevnikova M. 2017. Vegetation Database of Tatarstan. *Phytocoenologia* 47(3): 309–313. DOI: 10.1127/phyto/2017/0172
- Ruchin A.B., Artaev O.N., Klevakin A.A., Moreva O.A., Osipov V.V., Levin B.A., Ilyin V.Yu., Mikheev V.A., Ermakov A.S., Yankin A.V., Vargot E.V., Alyushin I.V. 2016. *Fish fauna of the Sura River basin: species diversity, populations, distribution, conservation*. Saransk: Mordovia State University. 272 p. [In Russian]
- Semenishchenkov Yu.A. 2014. Phytocoenotic diversity of the gray alder forests the southern-west of Nechernozemye of Russia. *Vegetation of Russia* 25: 71–88. [In Russian]
- Seregin A.P. 2008. Some new and rare species of Vladimir Province flora. Fourth report. *Bulletin of Moscow Society of Naturalists* 113(3): 69–71. [In Russian]
- Solovyova V.V. 2017. *Structure and dynamics of the vegetation cover of small artificial reservoirs in the Middle Volga region*. Samara: Samara State Social-Pedagogical University. 291 p. [In Russian]
- Solovyova V.V. 2020. Environmental role of technogenic reservoirs of the Samara Region for coastal water macrophytes. In: *Ecology. Risk. Security*. Kurgan. P. 173–174. [In Russian]
- Solov'eva V.V., Saksonov S.V. 2007. Phytomonitoring of the Samara botanical garden ponds. *Samarskaya Luka: Problems of Regional and Global Ecology* 16(1–2): 208–234. [In Russian]
- Vargot E.V. 2009. Materials to the flora of River Barysh. *Phytodiversity of Eastern Europe* 7: 181–184. [In Russian]
- Vargot E.V., Grishutkin O.G., Artaev O.N. 2015. Results of investigations of wetlands Kryachek Lake and neighborhood (Ulyanovsk Region). *Samara Journal of Science* 2(11): 41–45. [In Russian]
- Vasjukov V.M., Ivanova A.V., Senator S.A., Saksonov S.V. 2014. Flora materials of the Kuznetsk district in Penza Region. *Phytodiversity of Eastern Europe* 8(2): 57–66. [In Russian]
- Vasjukov V.M., Gorbushina T.V., Novikova L.A., Pchelinceva T.I. 2019. Materials to the flora of the south of the Penza Region: Malay Serdoba district. *Samarskaya Luka: Problems of Regional and Global Ecology* 28(4): 117–129. – DOI 10.24411/2073-1035-2019-10280 [In Russian]
